# Supplementary material
Source: Springer Nature journal article supplement (https://www.springerprofessional.de/resource/supplementary/13638_2011_191_MOESM5_ESM.pdf/11897134)
Supplement: MOESM5 [file 11897134]

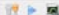

Configuration

| Property    | Value                      |
|-------------|----------------------------|
| Number...   | 100                        |
| X positi... | 471,2837,2217,1939,713,... |
| Y positi... | 1627,428,1012,1764,523,... |
| TX power    | 0                          |
| Receive...  | -95                        |
| Microco...  | ATMega128                  |
| Transcei... | CC2420                     |
| MAC Pro...  | Non-slotted CSMA-CA        |
| BO          | 0                          |

Topology

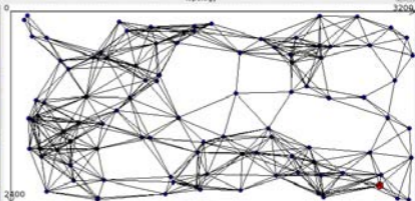

Console

```

11:03:04: begin emitting radio packet at time 9874 us
Proxy37: Complete emitting radio packet at time 9887 us
Node47: No free channel and retry transmitting this data at time 9889 us
Node47: generated a random number as backoff slots, slots = 24 at time 9889 us
Node83: find a free channel and begin transmitting the data to the transceiver at time 9890 us
Node83: starts to transmit the data to the transceiver ( _NR= 2 ) with data = 1.76 at time 9890 us
Node33: find a free channel and begin transmitting the data to the transceiver at time 9892 us
Node33: starts to transmit the data to the transceiver ( _NR= 2 ) with data = 1.76 at time 9892 us
Proxy62: Complete emitting radio packet at time 9924 us
Node87: No free channel and retry transmitting this data at time 9927 us
Node87: generated a random number as backoff slots, slots = 13 at time 9927 us

```

Ready
